# Supplementary material
Source: Royal Society of Chemistry journal article supplement (https://www.rsc.org/suppdata/cp/1999/2733/supp.doc)
Supplement: Supplementary file 1 [file supp.doc]

Table 1 Coexistence curves of (T,n), (T,x), and (T, ) for {xNMP + (1 - x)methylcyclohexane}. Refractive indices were measured at wavelength =6.328  10-7 m. Subscripts 1 and 2 relate to upper and lower phases. Tc = 290.180 K

| T/K | n1 | n2 | x1 | x2 | φ1 | φ2 |
| --- | --- | --- | --- | --- | --- | --- |
| 290.109  290.088  290.056  290.022  289.954  289.888  289.791  289.694  289.567  289.436  289.190  288.938  288.501  287.999  287.494  286.994  286.491  285.991  284.987  283.994  283.032 | 1.4379  1.4378  1.4375  1.4373  1.4369  1.4366  1.4363  1.4361  1.4358  1.4356  1.4352  1.4347  1.4342  1.4338  1.4336  1.4335  1.4334  1.4333  1.4331  1.4331  1.4331 | 1.4432  1.4434  1.4437  1.4440  1.4445  1.4449  1.4453  1.4457  1.4460  1.4465  1.4473  1.4479  1.4488  1.4498  1.4506  1.4513  1.4520  1.4527  1.4539  1.4551  1.4561 | 0.369  0.366  0.359  0.354  0.344  0.336  0.328  0.323  0.314  0.308  0.296  0.281  0.263  0.248  0.236  0.228  0.219  0.211  0.193  0.180  0.168 | 0.486  0.490  0.497  0.503  0.513  0.520  0.528  0.535  0.540  0.550  0.564  0.574  0.588  0.604  0.616  0.625  0.635  0.644  0.659  0.674  0.685 | 0.306  0.303  0.297  0.292  0.283  0.276  0.269  0.264  0.256  0.251  0.240  0.227  0.212  0.198  0.189  0.182  0.174  0.167  0.152  0.142  0.132 | 0.416  0.420  0.426  0.432  0.442  0.450  0.457  0.464  0.469  0.479  0.493  0.503  0.518  0.534  0.547  0.557  0.567  0.577  0.593  0.609  0.621 |

Supplementary 2 Refractive index n at wavelength 6.32810-7 m for {xNMP + (1-x) methylcyclohexane} at various temperatures T.

| x | T/K | n | T/K | n | T/K | n |
| --- | --- | --- | --- | --- | --- | --- |
| 0.0000  0.0970  0.2061  0.2988  0.3865  0.5062  0.5986  0.6985  0.8257  0.9107  1.0000 | 292.15  290.15  288.65  286.15  280.15  292.15  290.15  288.65  286.15  280.15  292.15  290.15  292.15  292.15  292.15  292.15  290.15  292.15  290.15  288.65  286.15  292.15  290.15  288.65  286.15  280.15  292.15  290.15  288.65  286.15  280.15  292.15  290.15  288.65  286.15  280.15 | 1.4225  1.4236  1.4243  1.4256  1.4286  1.4259  1.4268  1.4276  1.4288  1.4319  1.4300  1.4310  1.4339  1.4377  1.4432  1.4477  1.4486  1.4528  1.4536  1.4543  1.4554  1.4594  1.4603  1.4610  1.4620  1.4646  1.4641  1.4650  1.4656  1.4667  1.4694  1.4697  1.4705  1.4711  1.4723  1.4747 | 291.15  289.65  288.15  284.15  278.15  291.15  289.65  288.15  284.15  278.15  291.15  289.65  291.15  291.15  291.15  289.65  291.15  289.65  288.15  284.15  291.15  289.65  288.15  284.15  278.15  291.15  289.65  288.15  284.15  278.15  291.15  289.65  288.15  284.15  278.15 | 1.4231  1.4238  1.4246  1.4266  1.4297  1.4263  1.4271  1.4278  1.4298  1.4329  1.4305  1.4312  1.4343  1.4437  1.4481  1.4488  1.4532  1.4538  1.4545  1.4563  1.4598  1.4606  1.4612  1.4628  1.4655  1.4646  1.4651  1.4658  1.4676  1.4702  1.4701  1.4708  1.4714  1.4731  1.4755 | 290.65  289.15  287.15  282.15  290.65  289.15  287.15  282.15  290.65  289.15  290.65  290.65  289.15  287.15  290.65  289.15  287.15  282.15  290.65  289.15  287.15  282.15  290.65  289.15  287.15  282.15 | 1.4234  1.4241  1.4250  1.4275  1.4266  1.4274  1.4284  1.4308  1.4307  1.4315  1.4484  1.4534  1.4541  1.4550  1.4601  1.4607  1.4616  1.4637  1.4648  1.4654  1.4663  1.4685  1.4704  1.4710  1.4718  1.4739 |
